# Supplementary material for: A role for NANOG in G1 to S transition in human embryonic stem cells through direct binding of CDK6 and CDC25A
Source: PubMed Central journal article supplement — J Cell Biol. 2009 Jan 12;184(1):67–82. doi: 10.1083/jcb.200801009 (PMC2615089; doi:10.1083/jcb.200801009), 2009-01-12
Supplement: jcb.200801009_1.pdf [file jcb.200801009_1.pdf]

Zhang et al., <http://www.jcb.org/cgi/content/full/jcb.200801009/DC1>

H1 NANOG

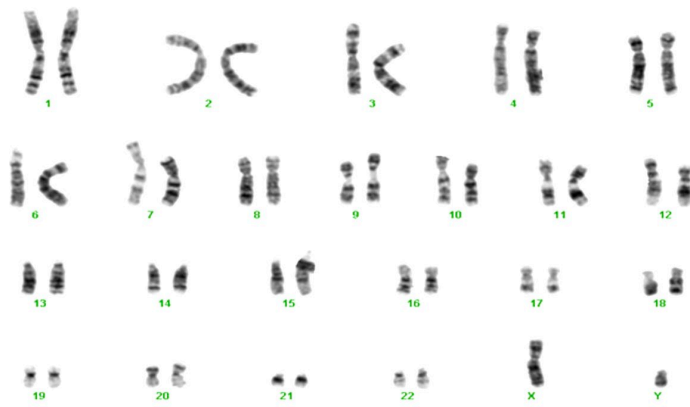

hES-NCL1 NANOG

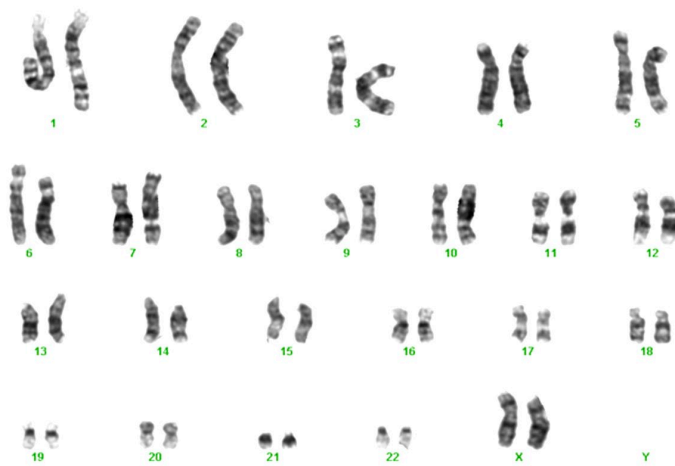

H9 NANOG

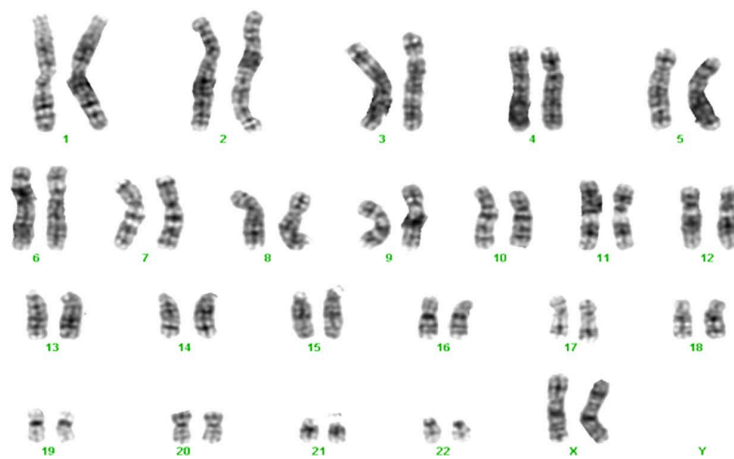

Figure S1. Karyotype analysis of H1 NANOG and hES-NCL1 NANOG clones after 20 passages in culture.

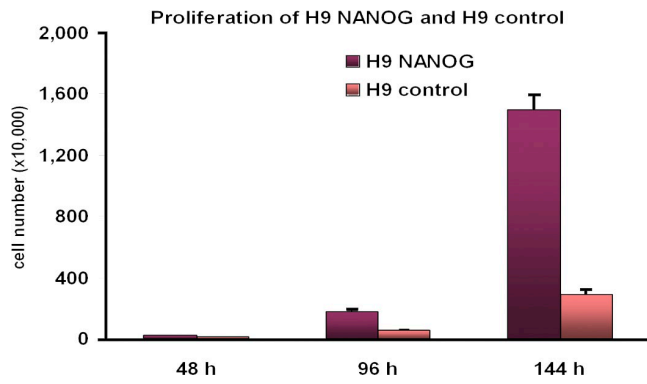

Figure S2. **Cell proliferation assessed by cell counting over three time points.** 25,000 cells from the H9 NANOG and control sublines were plated at day 0, and cell counts were assessed after 2, 4, and 6 d. The data are presented as mean  $\pm$  SEM (error bars;  $n = 4$ ).

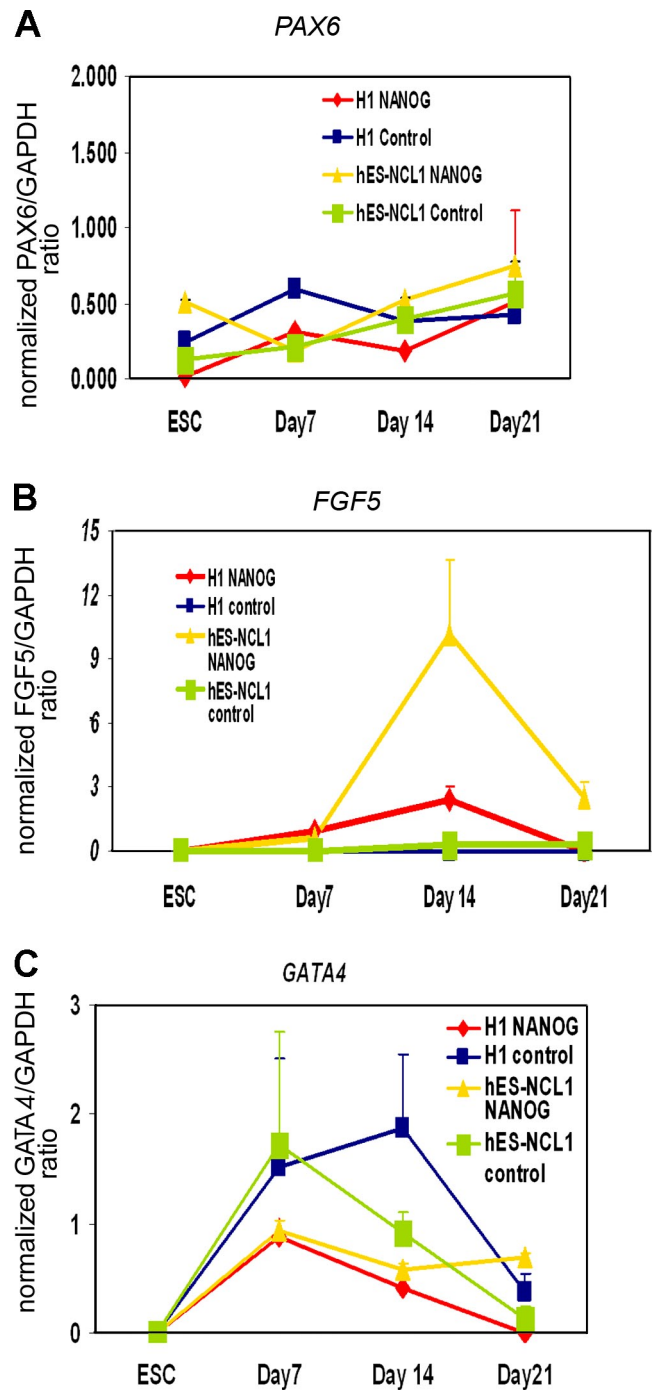

Figure S3. **Maintenance of pluripotency and differentiation capability of NANOG-overexpressing hESC clones.** (A–C) Quantitative RT-PCR analysis for the expression of *PAX6* (A), *FGF5* (B), and *GATA4* (C) during the differentiation of NANOG-overexpressing and control clones for 21 d in suspension culture. The data represent the mean  $\pm$  SEM (error bars) from two independent experiments. Statistical analysis was performed using two-factor analysis of variance with replication.

**A****CDK6 intron 1 fragment (corresponding to position 92106071 to 92106651 on chromosome 7)**

ACATGCTCCTCAGACCACTAATATGCAAAAAGAACCTAAGGATCTGGTCACCAAGTTACGTCAAAAAGAGTT  
 TACCCCATAGTCCTTTTTACTGCCTTTTGCAGAACAAACGTTTAATAATGTCGCTATTGTTTCATTGGTTA  
 TCAAGAAATAACTCATTGTAAGTCAAGAGTCTTAGCAAAGAAATCTATCTCATATGTACTTTCTTTATTT  
 CAAGAAGTTAAGGAGGCAGGTTTTCTACGTGTGTTACCAAAGCGCCAAGATTTTTTTTAATATTTTTGA  
 GAAAATATTTTCAGTAAATCTGTATTCATTGAAT GAAATATTAAGTGGATCCATAAAGAAGCAGATGATA  
 TAAGTCCCAGGATAACATCAGGAGAATCTGAACACAGTGTAGCTGAAGCATTTCATCACCCCCCAACAAG  
 AAAATTGCTATTTTGCCAATCTTACCACATTGCAGTGTCTAAGATCTACATTTTTTTTACATTTA  
 TTTCTAAAAATCAAAATGTGAATTGCAGTCAACTGGTGACATCTTAGATCTGATGAGATATGGTGGTTCT  
 CCTGGAAAAGCAAAGTTAGT

**CDC25A promoter fragment (corresponding to position 48204409 to 48205364 on chromosome 3)**

AGGCCGAGCCAAGGCTGGATCCGGCCAGACCTCCACAGGTCTTCTTAGCCTCCACATTGCCTCAGAGTG  
 TGGGGCGCCCCGGCTGGGGGCGAGGTAGCGGAGGCCAAAGGGGGCCGAAGCTAACTGGACGGCAGCTCGC  
 GATGGGAACACTACGTTCCCAGCATGCGACGGGGCAAAGGGCCCTTTCAGCCGCGAGCAGCGCCTCGCAGG  
 TTCTGCTGGGAGTTTTATTGACCTCTGCTCCCCCTCTCATTTTGTATCCCCGCTCTTCTGCTCTGGGCTC  
 CGCCCCCTTCTGAGAGCCGATGACCTGGCAGAGTCCCAGCAGCCGCTTCTTCTTCCCCTCTCATTGGCC  
 CAGCCTAGCTGCCATTCGGTTGAGAGGAGGAGAAGTTGCTTACTGATTGGTGATTCCGTTTGGCGCCAA  
 CTAGGAAAGGGGGGCGGCGAGCAGCTGGCCCCACTGAG CCGCTATTACCGCGAAAGGCCGGCCTGGCTG  
 CGACAGCCTGGGTAAGAGGTGTAGGTCGGCTTGGTTTTCTGCTACCCGGAGCTGGGCAAGCGGGTGGGAG  
AACAGCGAAGACAGCGTGAGCCTGGGCCGTTGCCTCGAGGCTCTCGCCCGCTTCTCTTGCCGACCCGCC  
 ACGTTTGTGGATTTAATCTTCAGGTTGCCGGCGCCCGCCCGCCGCTGGCCTCGCGGTGTGAGAGGGA  
 AGCACCCGTGCCTGTGGCTGGTGGCTGGCGCCTGGAGGGTCCGCACACCCGCCCGCCGCGCCGCTTGGC  
 CGCGGCAGCCGCTCCCTGAACCGCGGAGTCGTGTTGTGTTGACCCGCGGGCGCCGGTGGCGCGCGGC  
 CGAGGCCGGTGTGGCGGGGGCGGGGGCGGTGCGGGCGGAGGCAGAGGAAGAGGGAGCGGGAGCTCTGCGAG  
 GCCGGGCGCCCGCC ATGGAACTGGGCCCGGAGCCCCCGCACCCGCCG

**B**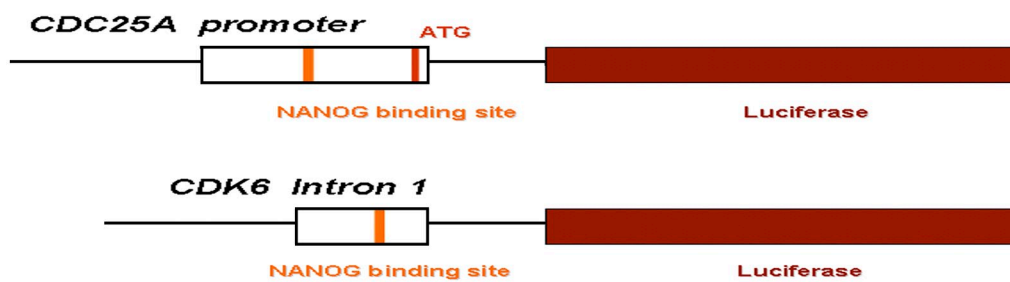**C**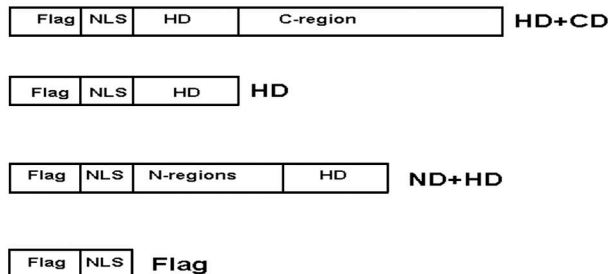**D**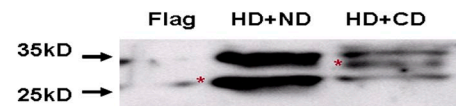

**Figure S4. The C-terminal domain of NANOG is responsible for transactivation of CDK6 and CDC25A.** (A) DNA fragments of *CDK6* (intron 1) and *CDC25A* (promoter) containing the NANOG consensus-binding motif (shown in orange) showing the most important region ATTA and other matching nucleotides (underlined). The transcription start site in the *CDC25A* gene is indicated by blue, and the translational start codon ATG is shown in red. (B) Schematic representation of *CDC25A*- and *CDK6*-luciferase constructs. NANOG-binding sites are indicated in orange, and the translational start codon ATG is shown in red. (C) Schematic representation of constructs containing different regions of human NANOG (gift from J.-H. Kim). HD + CD, DNA construct containing the homeodomain and C-terminal region of NANOG; HD, DNA construct containing the homeodomain region of NANOG; ND + HD, DNA construct containing the homeodomain and the N-terminal region of NANOG; Flag, DNA construct without NANOG cDNA. (D) Western blot with Flag antibody of hESC transfected with NANOG constructs highlighted in C. The asterisks indicate the predicted positions based on the calculated molecular weight. This analysis also revealed the additional fragment with larger molecular mass than predicted, corroborating data also reported by Oh et al. (Oh, J.H., H.J. Do, H.M. Yang, S.Y. Moon, K.Y. Cha, H.M. Chung, and J.H. Kim. 2005. *Exp. Mol. Med.* 37:250–254) and suggesting the formation of higher molecular weight complexes.

Table S1. **Sequences of siRNAs used for the down-regulation of *CDK6*, *CDC25A*, and *NANOG***

| Gene name     | Supplier                       | Sequence of the corresponding sense strand for the siRNA                                                         |
|---------------|--------------------------------|------------------------------------------------------------------------------------------------------------------|
| <i>NANOG</i>  | Sana Cruz Biotechnology, Inc.  | 5'-AAGGGUUAAGCUGUAACAUAC-3'                                                                                      |
| <i>NANOG</i>  | Invitrogen                     | 5'-GGGUUCACGCCAUUCUCCUGCCUCA-3'<br>5'-CAGUGACUUGGAGGCUGCUUUGGAA-3'<br>5'-UCUUUGUAGAAAGAGGUCUUGUAUU-3'            |
| <i>CDK6</i>   | Santa Cruz Biotechnology, Inc. | 5'-GAGUAGUUCUCUCUAACUA-3'<br>5'-GCAGAAUUGUUUCGUAGAA-3'<br>5'-GACUCAAGGUGGUCAGUAA-3'<br>5'-GGAGAGUAGUUCUCUCUAA-3' |
| <i>CDK6</i>   | Invitrogen                     | 5'-GGCAAAGACCUACUUCUGAAGUGUU-3'<br>5'-GACCACUACUUGGAUAAAGUCCCA-3'<br>5'-ACCGAGUAGUGCAUCGCGAUCUAAA-3'             |
| <i>CDC25A</i> | Santa Cruz Biotechnology, Inc. | 5'-GGCGCUAUUUUGGCGCUUCA-3'                                                                                       |
| <i>CDC25A</i> | Invitrogen                     | 5'-GGACAAUGACCCAAGGGACCUUUA-3'<br>5'-GCCAACCUCAUUAAGAGUUUGUUA-3'<br>5'-GGGAGAUGUACAGUCGUCUGAAGAA-3'              |

Table S2. **Sequences of oligonucleotides used for the quantitative RT-PCR analysis**

| <b>Gene name</b>                 | <b>Forward primer</b>           | <b>Reverse primer</b>       |
|----------------------------------|---------------------------------|-----------------------------|
| <i>CDK6</i> (total expression)   | 5'-AGGATAAGCCAACCTGAGAC-3'      | 5'-ACTGAGAGTATGACTGGCAA-3'  |
| <i>CDK6</i> (endogenous)         | 5'-GTAATCGTGTCTGTGTTGAG-3'      | 5'-TCTGCACCCGCACGCGCTTC-3'  |
| <i>NANOG</i> (total expression)  | 5'-AGAAGGCCTCAGCACCTAC-3'       | 5'-GGCCTGATTGTTCCAGGATT-3'  |
| <i>NANOG</i> (endogenous)        | 5'-GGACTGAGCTGGTTGCCTCAT-3'     | 5'-CGTGTGAGGCATCTCAGCAG-3'  |
| <i>CDK4</i>                      | 5'-ACTGGCCTCGAGATGTATCC-3'      | 5'-TGCTGCAGAGCTCGAAAGGC-3'  |
| <i>CDC25A</i> (total expression) | 5'-CGGTATGTGAGAGAGAGAGA-3'      | 5'-GACTGTACATCTCCCTCTTG-3'  |
| <i>CDC25A</i> (endogenous)       | 5'-CGCGTCCCTGAACCGCGGAG-3'      | 5'-CGGCGGCTGAAGCGCCAAATA-3' |
| <i>SUV39H1</i>                   | 5'-CATAGACAACCTTGACGAGC-3'      | 5'-CCACACTTGATTCAATACG-3'   |
| <i>p16</i>                       | 5'-CGCACCGAATAGTTACGGTC-3'      | 5'-ACCACCAGCGTGTCCAGGAA-3'  |
| <i>c-MYC</i>                     | 5'-TCGCAAGACTCCAGCGCCTT-3'      | 5'-GCAGAAGGTGATCCAGACTC-3'  |
| <i>CYCLIN D1</i>                 | 5'-TGGTGAACAAGCTCAAGTGG-3'      | 5'-TGAGGCGGTAGTAGGACAGG-3'  |
| <i>CYCLIN D2</i>                 | 5'-TGAGGCGGTGTAGGACAGG-3'       | 5'-ATATCCCGCACGCTGTAGG-3'   |
| <i>CYCLIN D3</i>                 | 5'-CATGTACCCGCCATCCAT-3'        | 5'-AGCTTCGATCTGCTCCTGAC-3'  |
| <i>p19</i>                       | 5'-ATGCTGCTGGAGGAGGTT-3'        | 5'-CAGCAGTGTGACCCTTTGA-3'   |
| <i>p15</i>                       | 5'-CGGGGACTAGTGGAGAAGGT-3'      | 5'-GGTGAGAGTGGCAGGGTCT-3'   |
| <i>p18</i>                       | 5'-ACGTCAATGCACAAAATGGA-3'      | 5'-CGAAACCAGTTCGGTCTTTC-3'  |
| <i>E2F1</i>                      | 5'-CCTCATCCCCTCACACAGAT-3'      | 5'-CCCCAAAGTCACAGTCGAAG-3'  |
| <i>CYCLIN E1</i>                 | 5'-CCCCAAAGTCACAGTCGAAG-3'      | 5'-GGGGAGAGGAGAAGCCCTAT-3'  |
| <i>CYCLIN A</i>                  | 5'-GGGTATCAGTGGTGCACAT-3'       | 5'-GGGGAGAGGAGAAGCCCTAT-3'  |
| <i>CDK2</i>                      | 5'-TGACCTCCCCTGGATGAAG-3'       | 5'-CATCTGGAAGAAAGGGTGA-3'   |
| <i>RB</i>                        | 5'-TGAATCTCTTTTGGATTTTATGTCA-3' | 5'-TTTCTGCTTTGCATTCGTG-3'   |
| <i>c-ABL</i>                     | 5'-GCTGCAGAGCACAGAGACAC-3'      | 5'-CTCTTTTCGAGGGAGCAATG-3'  |

RB, Retinoblastoma.

Table S3. **Sequences of oligonucleotides used for the quantitative PCR after ChIP experiments**

| <b>Gene name</b> | <b>Forward primer</b>        | <b>Reverse primer</b>       |
|------------------|------------------------------|-----------------------------|
| <i>CDK6</i>      | 5'-ACATGCTCCTCAGACCACTAAT-3' | 5'-ACTAACTTTTGCTTTTCCAGG-3' |
| <i>CDK4</i>      | 5'-CCTCTGCTCCTCAGAGCAAT-3'   | 5'-GACAGGAGGTGCTTCGACTG-3'  |
| <i>CDK2</i>      | 5'-GAAACTTGGACCCAAAGCAG-3'   | 5'-CCAGGCCTTTCTATTGGTCA-3'  |
| <i>CDC25A</i>    | 5'-CGGTATGTGAGAGAGAGAGA-3'   | 5'-TTGCCAGCTCCGGGTAGCA-3'   |
| <i>c-MYC</i>     | 5'-CCGCCTGCGATGATTATAC-3'    | 5'-CAGCCGAGCACTCTAGCTCT-3'  |
